# Supplementary material for: A Study of Chemical Processes of Nitrate in Atmospheric Aerosol and Snow Based on Stable Isotopes
Source: MDPI journal article supplement (doi:10.3390/atmos15010059), 2023-12-31
Supplement: s1 [file s1]

Review

# A Study of Chemical Processes of Nitrate in Atmospheric Aerosol and Snow Based on Stable Isotopes

Mengxue Chen <sup>1,2</sup>, Hewen Niu <sup>1,2,\*</sup> and Yankun Xiang <sup>3</sup>

<sup>1</sup> State Key Laboratory of Cryospheric Sciences/National Field Science Observation and Research Station of Yulong Snow Mountain Cryosphere and Sustainable Development, Northwest Institute of Eco-Environment and Resources, Chinese Academy of Sciences, Lanzhou 730000, China

<sup>2</sup> University of Chinese Academy of Sciences (UCAS), Beijing 10049, China

<sup>3</sup> Nanjing Meteorological Bureau in Jiangsu Province, Nanjing 210019, China

\* Correspondence: niuhw@lzb.ac.cn

**Table S1.** Summary of values of  $\Delta^{17}\text{O}(\text{NO}_x)_x$ ,  $\delta^{18}\text{O}(\text{NO}_x)$ , and  $\delta^{15}\text{N}(\text{NO}_x)$  in Antarctic snow.

| Sampling sites | Latitude-longitude  | Sampling time     | $\delta^{18}\text{O}/\text{‰}$ | $\Delta^{17}\text{O}/\text{‰}$ | $\delta^{15}\text{N}/\text{‰}$ | Sample types | References |
|----------------|---------------------|-------------------|--------------------------------|--------------------------------|--------------------------------|--------------|------------|
| Antarctica     | 66.7°S<br>139.83°E  | 2000-2008         | 101±3                          | 41±1                           | 49±5                           | snow         | [99]       |
| Antarctica     | 67.41°S<br>138.62°E | 2000-2008         | 94±8                           | 44±2                           | 40±5                           | snow         | [99]       |
| Antarctica     | 67.91°S<br>136.7°E  | 2000-2008         | 92±4                           | 35±1                           | 15±4                           | snow         | [99]       |
| Antarctica     | 68.53°S<br>135.24°E | 2000-2008         | 72±8                           | 30±2                           | 8±5                            | snow         | [99]       |
| Antarctica     | 69.31°S<br>134.33°E | 2000-2008         | 93±3                           | 37±1                           | 34±4                           | snow         | [99]       |
| Antarctica     | 70.25°S<br>134.1°E  | 2000-2008         | 69±5                           | 30±1                           | 38±5                           | snow         | [99]       |
| Antarctica     | 71.61°S<br>132.99°E | 2000-2008         | 66±6                           | 29±1                           | 37±3                           | snow         | [99]       |
| Antarctica     | 71.53°S<br>132.84°E | 2000-2008         | 53±6                           | 26±2                           | 72±21                          | snow         | [99]       |
| Antarctica     | 72.32°S<br>130.47°E | 2000-2008         | 49±5                           | 27±1                           | 99±11                          | snow         | [99]       |
| Antarctica     | 73.99°S<br>128.71°E | 2000-2008         | 44±9                           | 29±2                           | 147±21                         | snow         | [99]       |
| Antarctica     | 73.84°S<br>126.91°E | 2000-2008         | 40±5                           | 23±2                           | 138±22                         | snow         | [99]       |
| Antarctica     | 74.71°S<br>124.55°E | 2000-2008         | 32±3                           | 28±1                           | 330±12                         | snow         | [99]       |
| Antarctica     | 75.1°S<br>123.35°E  | 2000-2008<br>N.D. |                                | N.D.                           | 151±21                         | snow         | [99]       |

|            |                     |               |      |      |        |      |       |
|------------|---------------------|---------------|------|------|--------|------|-------|
| Antarctica | 75.1°S<br>123.35°E  | 2000-2008     | 29±3 | 23±1 | 334±23 | snow | [99]  |
| Antarctica | 75.1°S<br>123.35°E  | 2000-2008     | 27±5 | 28±2 | 305±28 | snow | [99]  |
| Antarctica | 75.1°S<br>123.35°E  | 2000-2008     | 26±3 | 27±1 | 302±20 | snow | [99]  |
| Antarctica | 75.1°S<br>123.35°E  | 2000-2008     | 28±5 | 26±1 | 276±17 | snow | [99]  |
| Antarctica | 75.72°S<br>120.23°E | 2000-2008     | 12±5 | 19±2 | 288±25 | snow | [99]  |
| Antarctica | 76.84°S<br>112.99°E | 2000-2008     | 24±9 | 20±2 | 302±22 | snow | [99]  |
| Antarctica | 77.6779S<br>110.55E | 2000-2008     | 20±6 | 19±1 | 338±25 | snow | [99]  |
| Antarctica | 78.47°S<br>106.8°E  | 2000-2008     | 32±7 | 26±1 | 255±27 | snow | [99]  |
| Antarctica | 78.47°S<br>106.8°E  | 2000-2008     | 24±5 | 28±1 | 366±16 | snow | [99]  |
| Antarctica | 78.47°S<br>106.8°E  | 2000-2008     | 24±8 | 21±2 | 307±31 | snow | [99]  |
| Antarctica | 70°S 42.4°E         | 2012          | 69.1 | 27.4 | 20.6   | snow | [113] |
| Antarctica | 70.7°S 44.3°E       | 2012          | 66.1 | 26.9 | 25.7   | snow | [113] |
| Antarctica | 72.2°S 44.3°E       | 2012          | N.D. | N.D. | N.D.   | snow | [113] |
| Antarctica | 73.1°S 42.9°E       | 2012          | 55.4 | 24.1 | 41.1   | snow | [113] |
| Antarctica | 74.1°S 43°E         | 2012          | N.D. | N.D. | N.D.   | snow | [113] |
| Antarctica | 76°S 41.1°E         | 2012          | 68.8 | 31.9 | 83.5   | snow | [113] |
| Antarctica | 77.3°S 39.7°E       | 2012          | 51.3 | 29.4 | 127.3  | snow | [113] |
| Antarctica | 77.8°S 39.1°E       | 2012          | 44   | 24.9 | 111.7  | snow | [113] |
| Antarctica | 79.4°S 40.5°E       | 2012          | 37.5 | 24.5 | 165.5  | snow | [113] |
| Antarctica | 80°S 40.5°E         | 2013          | 37.7 | 20.3 | 90.7   | snow | [113] |
| Antarctica | 77.4°S 41.5°E       | 2013          | 19.8 | 13.2 | 74.3   | snow | [113] |
| Antarctica | 77.3°S 39.7°E       | 2013          | 25   | 18.7 | 118.6  | snow | [113] |
| Antarctica | 69°S 40.7°E         | 2016          | 75.8 | 28.2 | -19    | snow | [113] |
| Antarctica | 69.1°S 40.9°E       | 2016          | 85.5 | 30.8 | -6.6   | snow | [113] |
| Antarctica | 69.2°S 41.1°E       | 2016          | 82.3 | 28.8 | -14.5  | snow | [113] |
| Antarctica | 69.3°S 41.2°E       | 2016          | 83.7 | 30.3 | -19.4  | snow | [113] |
| Antarctica | 69.3°S 41.4°E       | 2016          | 77.8 | 30   | -6.4   | snow | [113] |
| Antarctica | 69.4°S 41.6°E       | 2016          | 91   | 34.5 | 14.1   | snow | [113] |
| Antarctica | 21.4°S 112.9°E      | 2012–<br>2013 | 73.4 | 25   | -6.7   | snow | [81]  |
| Antarctica | 27.2°S 113.4°E      | 2012–<br>2013 | 74.2 | 25.6 | -5.4   | snow | [81]  |
| Antarctica | 31°S 115°E          | 2012–<br>2013 | 71.4 | 25.2 | -5.6   | snow | [81]  |

|            |                |               |      |      |       |      |      |
|------------|----------------|---------------|------|------|-------|------|------|
| Antarctica | 32°S 115.7°E   | 2012–<br>2013 | 55.3 | 21   | -2.1  | snow | [81] |
| Antarctica | 34.1°S 115.1°E | 2012–<br>2013 | 67.1 | 23.8 | -4.2  | snow | [81] |
| Antarctica | 38.5°S 113.4°E | 2012–<br>2013 | 74.1 | 23.9 | -5.1  | snow | [81] |
| Antarctica | 43.6°S 111.9°E | 2012–<br>2013 | 83.7 | 30.4 | -14.7 | snow | [81] |
| Antarctica | 41.4°S 91.5°E  | 2012–<br>2013 | 75.5 | 27.1 | -10.9 | snow | [81] |
| Antarctica | 35.7°S 103.5°E | 2012–<br>2013 | 73.4 | 26.4 | -5.9  | snow | [81] |
| Antarctica | 32.8°S 112.8°E | 2012–<br>2013 | 59.3 | 22.8 | -9.8  | snow | [81] |

---

## References

81. Shi, G.; Buffen, A.; Ma, H.; Hu, Z.; Sun, B.; Li, C.; Yu, J.; Ma, T.; An, C.; Jiang, S.; et al. Distinguishing summertime atmospheric production of nitrate across the East Antarctic Ice Sheet. *Geochim. Cosmochim. Acta* **2018**, *231*, 1–14.
99. Erbland, J.; Vicars, W.C.; Savarino, J.; Morin, S.; Frey, M.M.; Frosini, D.; Vince, E.; Martins, J.M.F. Air-snow transfer of nitrate on the East Antarctic Plateau—Part 1: Isotopic evidence for a photolytically driven dynamic equilibrium in summer. *Atmos. Chem. Phys.* **2013**, *13*, 6403–6419.
113. Noro, K.; Hattori, S.; Uemura, R.; Fukui, K.; Hirabayashi, M.; Kawamura, K.; Motoyama, H.; Takenaka, N.; Yoshida, N. Spatial variation of isotopic compositions of snowpack nitrate related to post-depositional processes in eastern Dronning Maud Land, East Antarctica. *Geochemical Journal*. **2018**, *52*, e7–e14.
